# Supplementary material for: Circular RNA profiling and its potential for esophageal squamous cell cancer diagnosis and prognosis
Source: Springer Nature journal article supplement (doi:10.1186/s12943-018-0936-4), 2019-01-23

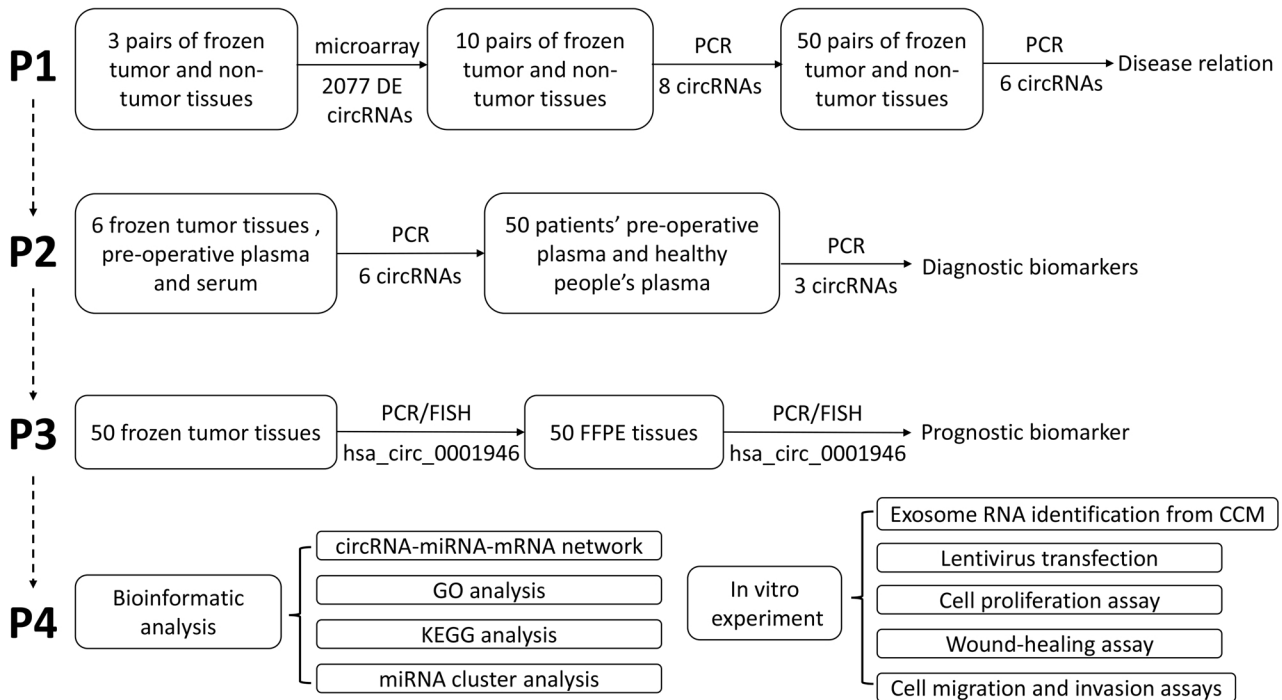

Supplement: MOESM1 [file 16415632]
